# Supplementary material for: Prediction of Sepsis in COVID-19 Using Laboratory Indicators
Source: PubMed Central journal article supplement (PMC7966961; doi:10.3389/fcimb.2020.586054), 2021-03-02

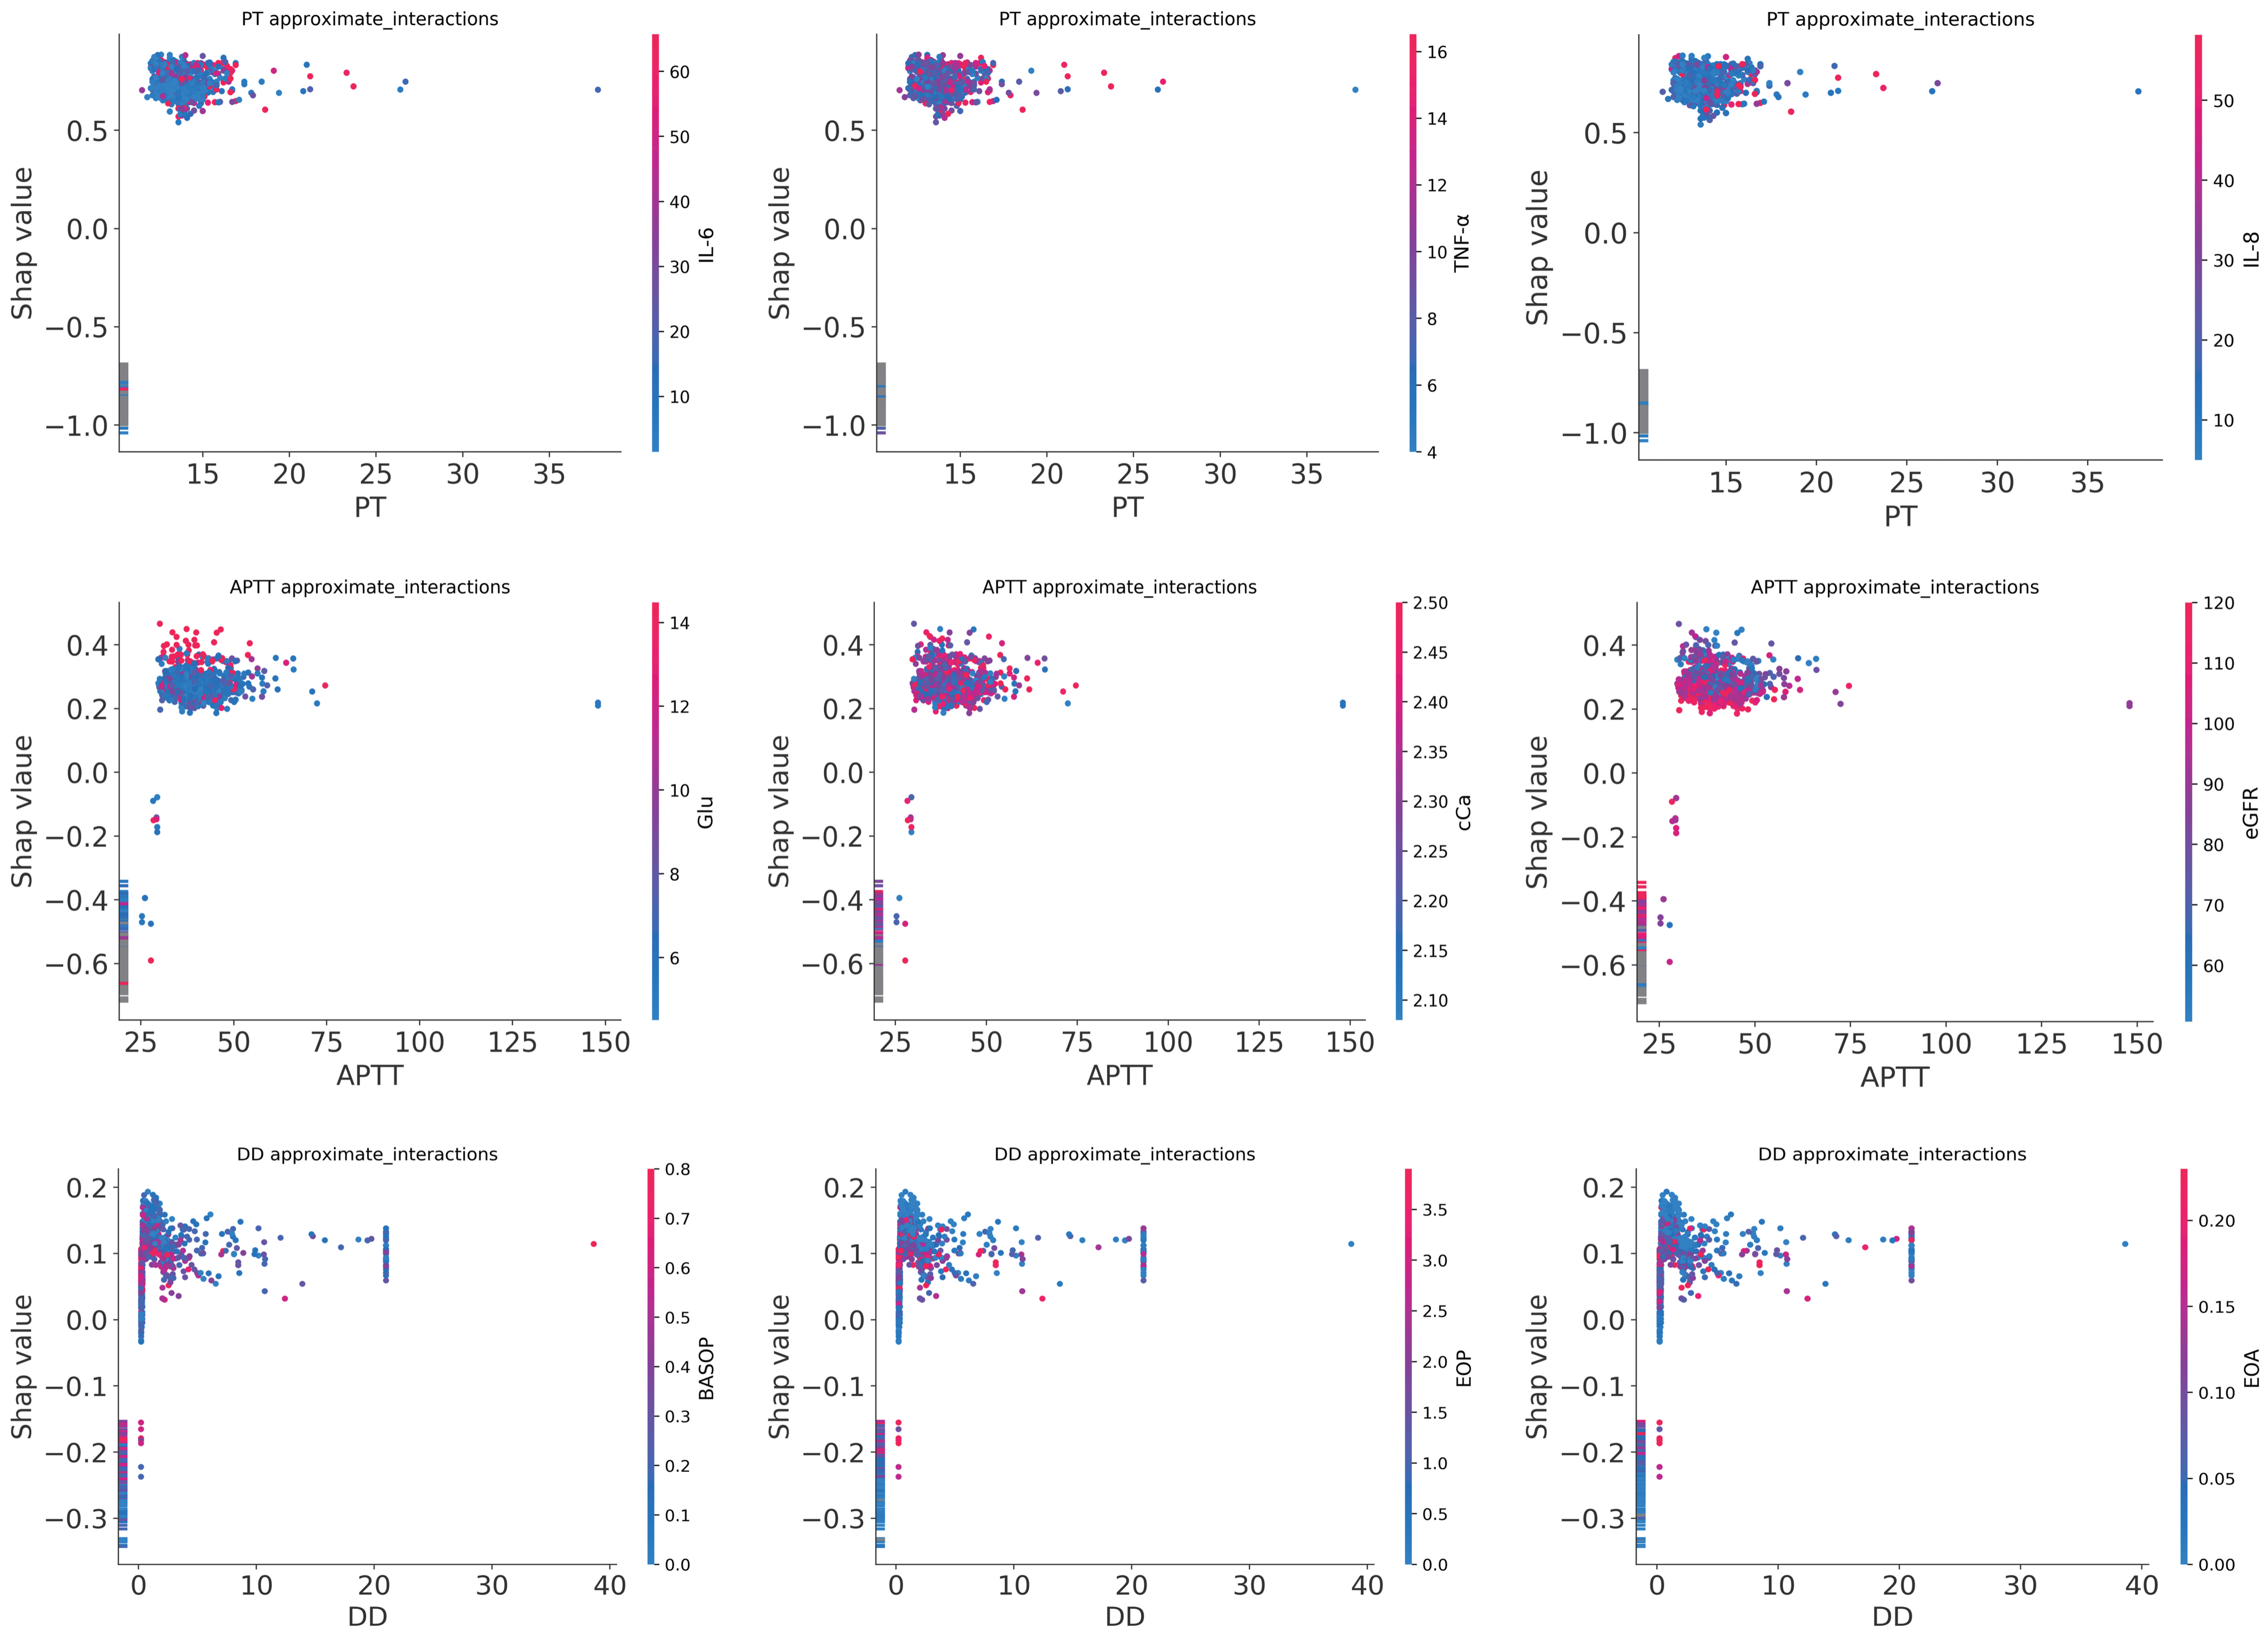

Supplement: DataSheet_1.pdf [file DataSheet_1.pdf]
