# Supplementary material for: Prediction of Sepsis in COVID-19 Using Laboratory Indicators
Source: PubMed Central journal article supplement (PMC7966961; doi:10.3389/fcimb.2020.586054), 2021-03-02
Supplement: DataSheet_3.pdf [file DataSheet_3.pdf]

shap summary plot

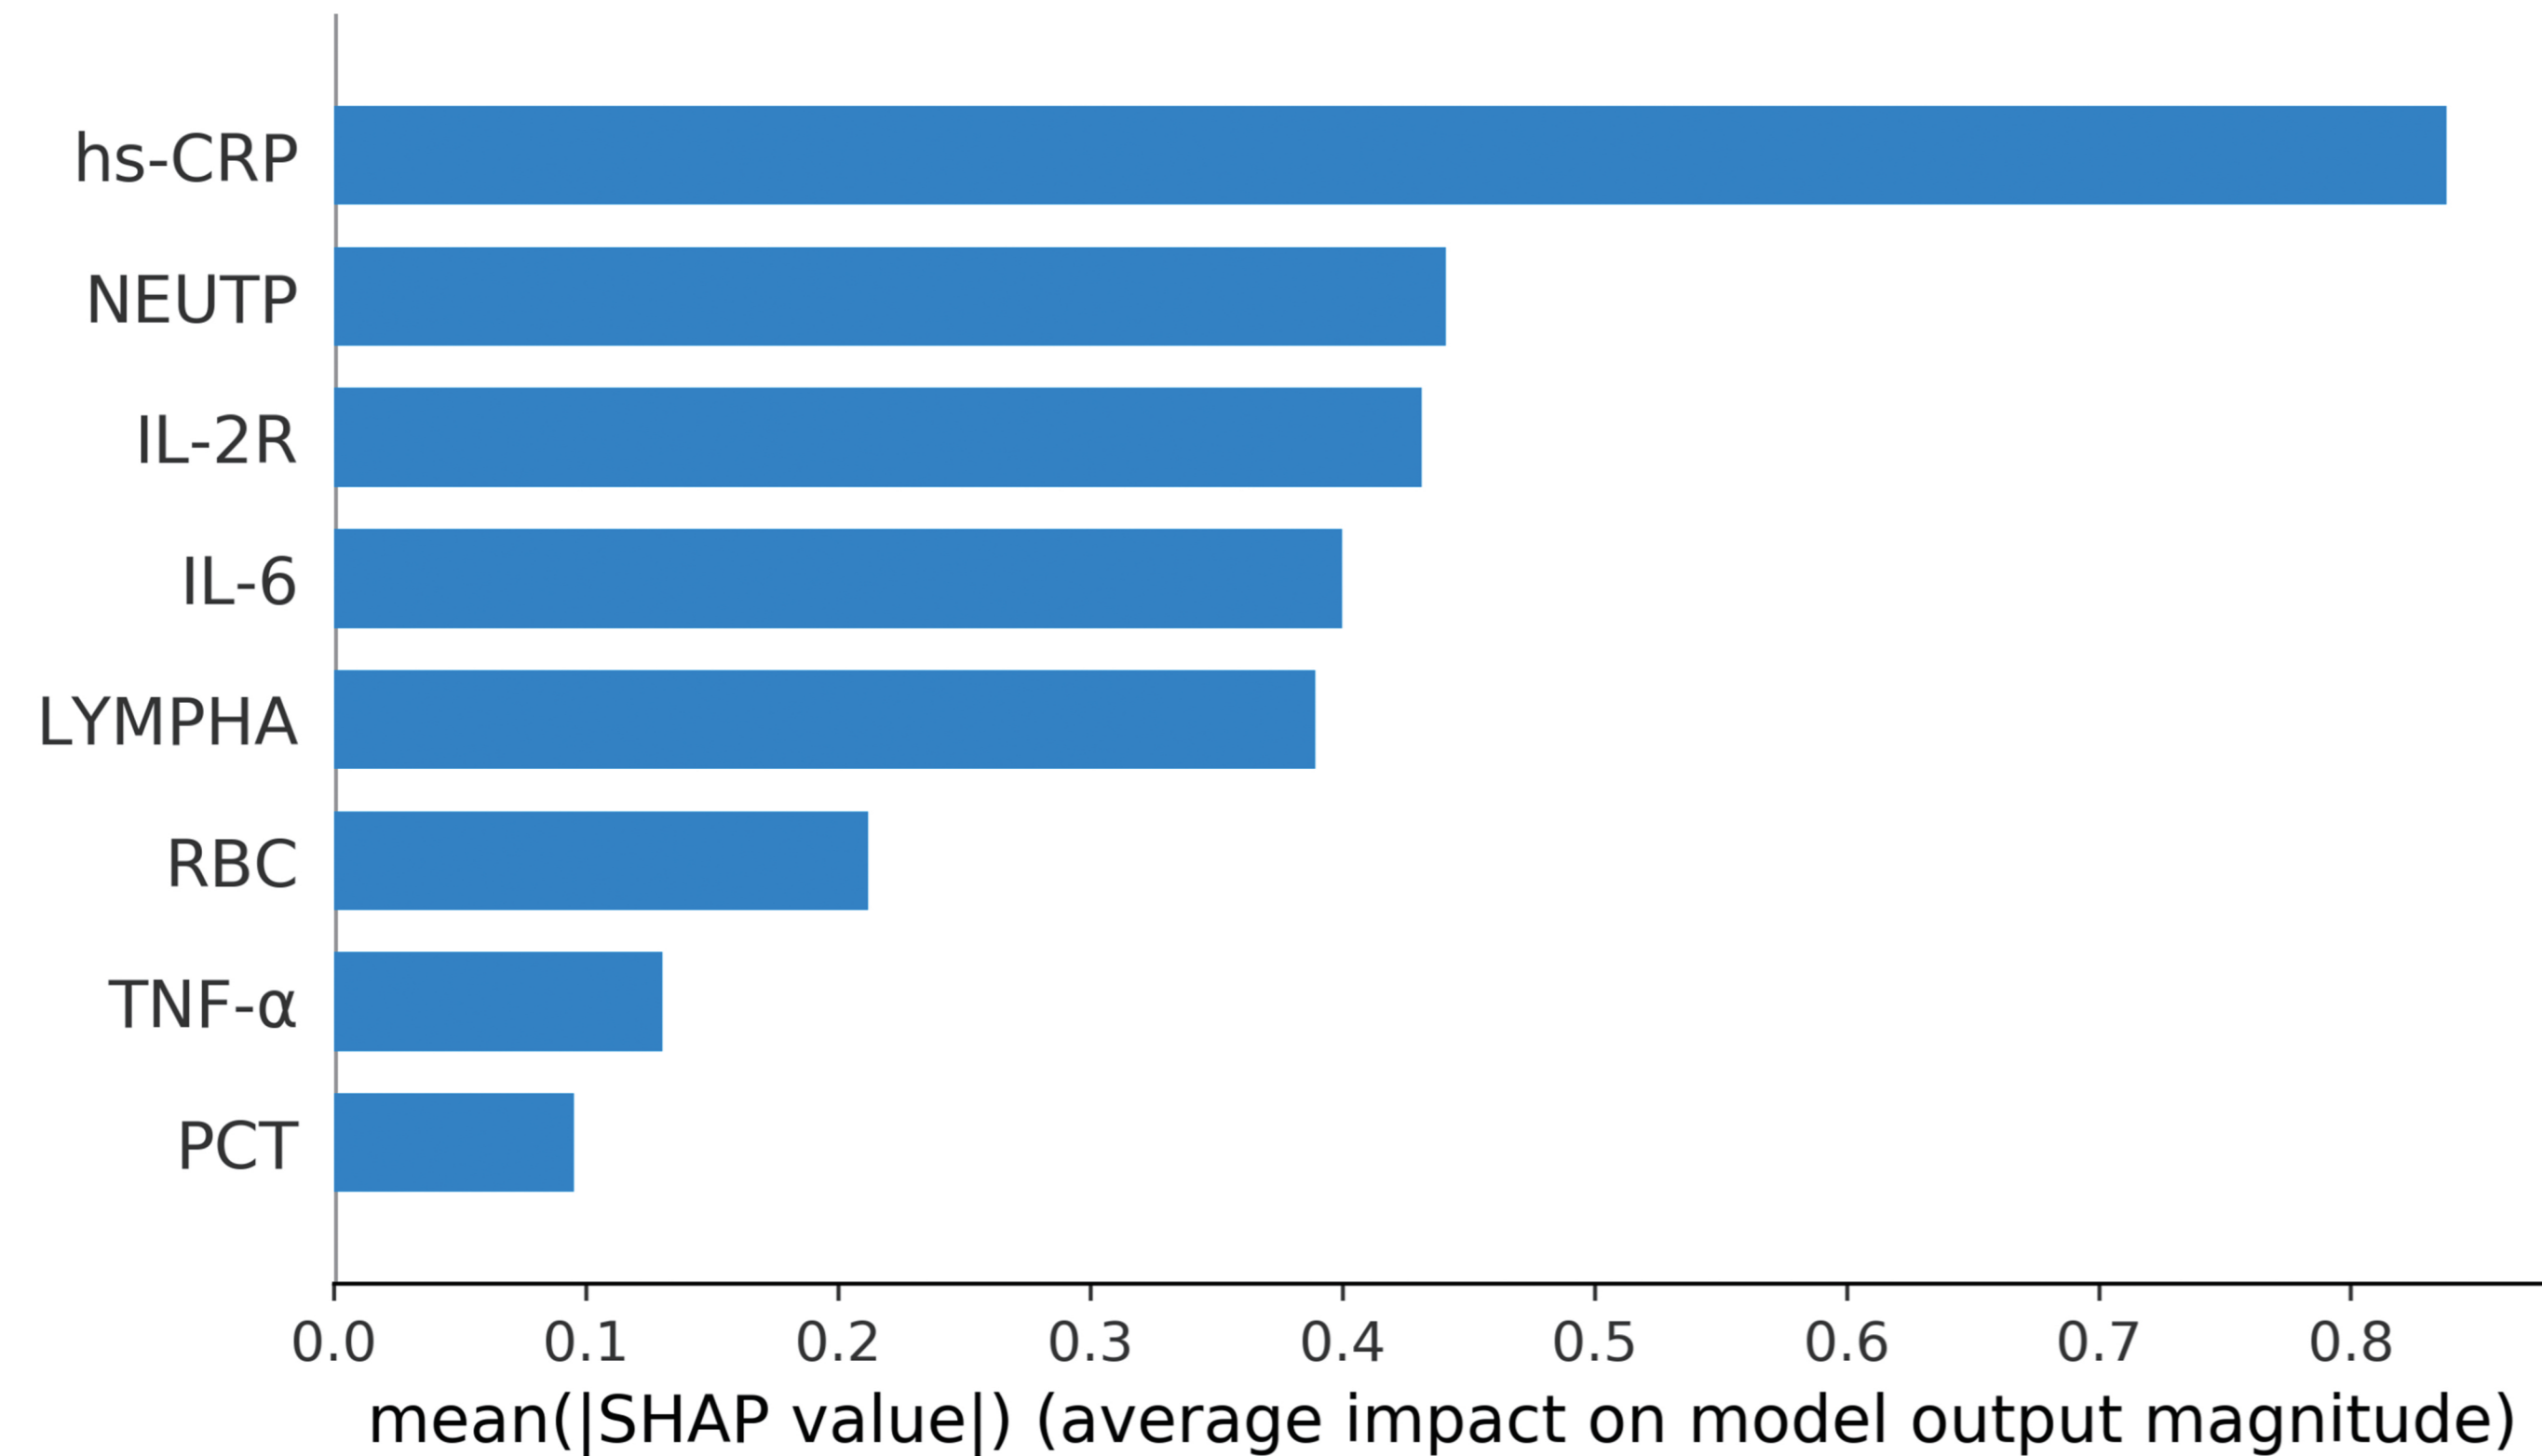

(a)

shap summary plot

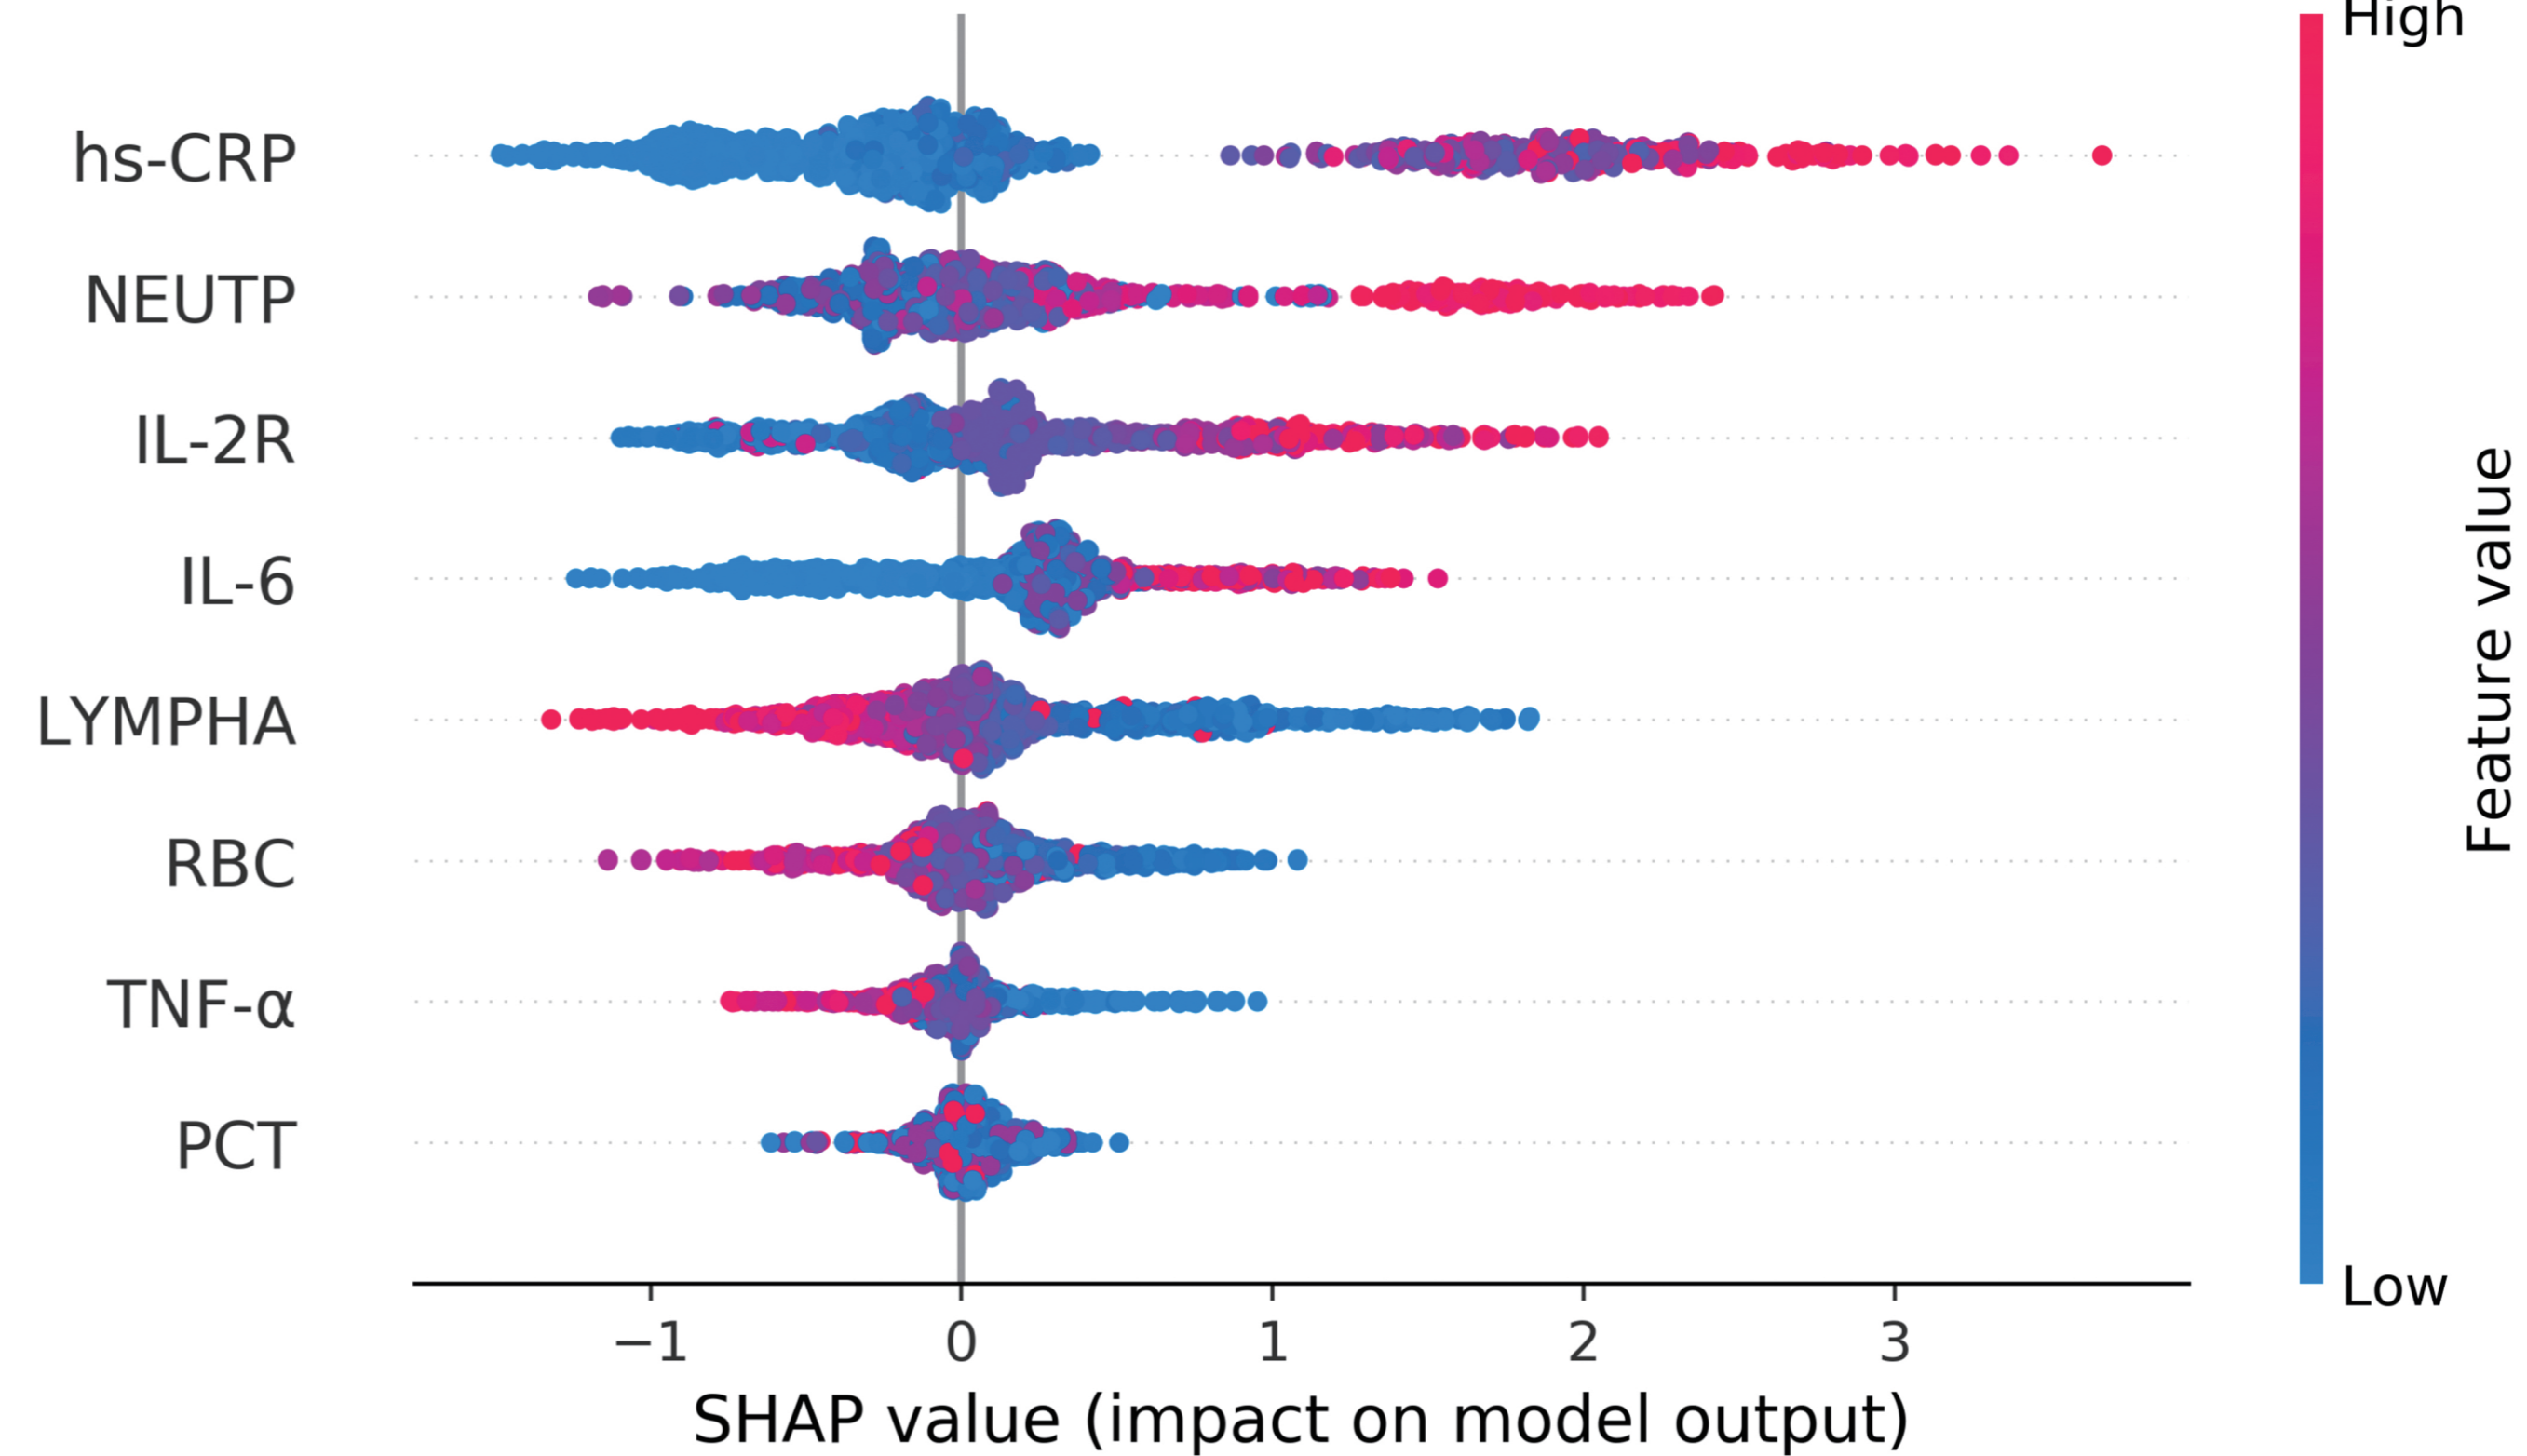

(b)
